# Supplementary material
Source: HighWire-hosted journal article supplement (https://bmjopenquality.bmj.com/highwire/filestream/147483/field_highwire_adjunct_files/0/bmjoq-2023-002475supp001_data_supplement.pdf)
Supplement: bmjoq-2023-002475supp001_data_supplement.pdf [file bmjoq-2023-002475supp001_data_supplement.pdf]

**Suppl Table 1.** Hospitals with ranking score

| Hospital                       | Ranking score per year |      |      |      |      |      |
|--------------------------------|------------------------|------|------|------|------|------|
|                                | 2006                   | 2007 | 2008 | 2009 | 2015 | 2016 |
| Akademiska sjukhuset           | 9                      | 7    | 6    | 6    | 6.5  | 8.0  |
| Alingsås lasarett              | 4                      | 2    | 4    | 5.5  | 5    | 6    |
| Arvika sjukhus                 | 3                      | 4.5  | 3.5  | 7    | 6.5  | 6.5  |
| Avesta lasarett                | 5                      | 3    | 4    | 4    | 5    | 5    |
| Blekingesjukhuset <sup>1</sup> | 4.7                    | 2    | 4.2  | 5.0  | --   | --   |
| - Karlshamn <sup>1</sup>       | 4                      | 2    | 4.5  | 3.5  | 6.5  | 5    |
| - Karlskrona <sup>1</sup>      | 5                      | 2    | 4    | 6    | 4.5  | 7.5  |
| Bollnäs sjukhus                | 6                      | 4    | 5    | 6.5  | 8    | 6.5  |
| Danderyds sjukhus              | 6                      | 3    | 6    | 8    | 8.5  | 9    |
| Enköpings lasarett             | 7                      | 5    | 6.5  | 6    | 4.5  | 5.0  |
| Falu lasarett                  | 6                      | 2.5  | 3    | 4.5  | 6    | 7.5  |
| Gällivare                      | --                     | --   | --   | --   | 5.5  | 7.5  |
| Gävle sjukhus                  | 6                      | 6    | 5    | 6    | 8    | 8    |
| Hallandssjukhus Halmstad       | 4                      | 3    | 5    | 3.5  | 5    | 5.5  |
| Hallandssjukhus Varberg        | 7                      | 3    | 4.5  | 5    | 6.0  | 6.5  |
| Helsingborgs lasarett          | 7                      | 3    | 4    | 4.5  | 6    | 5    |
| Huddinge sjukhus               | 8                      | 4    | 6.5  | 7    | 6.5  | 7.0  |
| Hudiksvalls sjukhus            | 4                      | 5    | 4.5  | 5    | 5.5  | 8    |
| Hässleholms sjukhus            | 4                      | 2.5  | 3    | 5    | 6    | 5.5  |
| Höglandssjukhuset              | 4                      | 2    | 5    | 7    | 6    | 6    |
| Kalix lasarett                 | 4                      | 2.5  | 1.5  | 4    | 6    | 5.5  |

|                               |    |     |     |     |     |     |
|-------------------------------|----|-----|-----|-----|-----|-----|
| Karlskoga lasarett            | 6  | 5   | 5   | 5   | 5   | 8   |
| Karlstads sjukhus             | 8  | 4.5 | 5.5 | 5.5 | 7   | 6   |
| Karolinska sjukhuset          | 8  | 3.5 | 6   | 5   | 6.5 | 8.0 |
| Kiruna lasarett               | 3  | 2   | 2.5 | 3.5 | 5.5 | 7   |
| Kristianstads sjukhus         | 6  | 5   | 6.5 | 6   | 4.5 | 7   |
| Kullbergsska sjukhuset        | 2  | 5.5 | 7.5 | 7.5 | 6.5 | 9   |
| Kungälv's sjukhus             | 7  | 3.5 | 3.5 | 3.5 | 7   | 9.5 |
| Köpings lasarett              | 7  | 3   | 5   | 4.5 | 9   | 8.5 |
| Lindesbergs lasarett          | 5  | 3   | 5   | 3   | 4.5 | 6.5 |
| Ljungby lasarett              | 6  | 5.5 | 5   | 6   | 6.5 | 7.5 |
| Lycksele lasarett             | 7  | 3.5 | 4   | 4   | 3   | 4   |
| Länssjukhuset Kalmar          | 6  | 4   | 3   | 4.5 | 6   | 7   |
| Mora lasarett                 | 2  | 4   | 6.5 | 7   | 5.5 | 6.5 |
| Motala lasarett               | 7  | 6   | 4.5 | 5   | 6.5 | 7   |
| Mälarsjukhuset                | 5  | 7   | 7   | 7.5 | 7.5 | 7.5 |
| Norrlands Universitetssjukhus | 7  | 3.5 | 5   | 4   | 8   | 8.5 |
| Norrtälje sjukhus             | 3  | 2.5 | 3   | 6.5 | 6.5 | 8.5 |
| NU-sjukvården <sup>2</sup>    | 5  | 2   | 3.3 | 4.5 | 7   | 6.5 |
| - Trollhättan <sup>2</sup>    | -- | --  | 4   | --  | --  | --  |
| - Uddevalla <sup>2</sup>      | -- | --  | 2   | --  | --  | --  |
| - Borås <sup>2</sup>          | 9  | 6.5 | 7   | 8   | 4.0 | 4.5 |
| - Skene <sup>2</sup>          | 7  | 5   | 3.5 | 5   | --  | --  |
| Nyköpings lasarett            | 4  | 5.5 | 7.5 | 8   | 8.5 | 8.5 |
| Oskarshamns sjukhus           | 6  | 4.5 | 6   | 6   | 7   | 8   |

|                                                |     |     |     |     |     |     |
|------------------------------------------------|-----|-----|-----|-----|-----|-----|
| Piteå                                          | --  | --  | --  | --  | 5.5 | 6.0 |
| Sahlgrenska Universitetssjukhuset <sup>3</sup> | 5.9 | 2.9 | 3.6 | 3.9 | 5.5 | 5.8 |
| - Mölndals sjukhus <sup>3</sup>                | 4   | 2   | 2.5 | 3.5 | --  | --  |
| - Cardiac intensive care unit <sup>3</sup>     | 6   | 3.5 | 4   | 5   | --  | --  |
| - Medical emergency department <sup>3</sup>    | --  | 2.5 | 4   | --  | --  | --  |
| - Östra sjukhuset <sup>3</sup>                 | 7   | 3   | 3.5 | 4   | --  | --  |
| Skaraborgs sjukhus <sup>4</sup>                | 2.8 | 2.9 | 3.3 | 6.2 | 5.5 | 6.0 |
| - Lidköping <sup>4</sup>                       | 5   | 4   | 3   | 6.5 | --  | --  |
| - Skövde <sup>4</sup>                          | 2   | 2.5 | 3.5 | 6   | --  | --  |
| Skellefteå lasarett                            | 0   | 3.5 | 3.5 | 4.5 | 3.5 | 2   |
| Sollefteå sjukhus                              | 2   | 3   | 0.5 | 4   | 7   | 8.5 |
| S:t Görans sjukhus <sup>5</sup>                | 7.6 | 5.6 | 7.5 | 8.5 | 7.5 | 8.5 |
| - Cardiac intensive care unit <sup>5</sup>     | 8   | 6   | --  | --  | --  | --  |
| - Chest pain center <sup>5</sup>               | 6   | 3.5 | --  | --  | --  | --  |
| Sunderbyn                                      | --  | --  | --  | --  | 5   | 8.5 |
| Sundsvalls sjukhus                             | 7   | 4   | 5   | 6   | 6   | 7   |
| Södersjukhuset                                 | 7   | 3.5 | 6   | 7   | 8.5 | 9   |
| Södertälje sjukhus                             | 5   | 2.5 | 3   | 4   | 4.5 | 6.5 |
| Torsby sjukhus                                 | 1   | 3.5 | 3.5 | 8   | 6.5 | 6.5 |
| Trelleborgs lasarett                           | 7   | 6   | 6.5 | 6.5 | 7   | 8.5 |
| Universitetssjukhuset i Linköping <sup>6</sup> | 6   | 7.5 | 7   | 5.3 | 7.5 | 7.5 |
| - Cardiac intensive care unit <sup>6</sup>     | 6   | 7.5 | 7   | 6   | --  | --  |
| - Medical emergency department <sup>6</sup>    | --  | --  | --  | 3   | --  | --  |
| Universitetssjukhuset i Lund                   | 7   | 3   | 5   | 6   | 7.5 | 8.5 |

|                                |   |     |     |     |     |     |
|--------------------------------|---|-----|-----|-----|-----|-----|
| Universitetssjukhuset MAS      | 8 | 5.5 | 7   | 6   | 7.5 | 8.5 |
| Universitetssjukhuset i Örebro | 5 | 5   | 4.5 | 4.5 | 7.5 | 8.5 |
| Visby lasarett                 | 3 | 2   | 3   | 4   | 4.5 | 4.5 |
| Vrinnevisjukhuset              | 4 | 3   | 5   | 5.5 | 6   | 7.5 |
| Värnamo sjukhus                | 5 | 4.5 | 5.5 | 7   | 6.5 | 5.5 |
| Västerås lasarett              | 7 | 7   | 6.5 | 8   | 9   | 9.5 |
| Växjö lasarett                 | 6 | 4.5 | 5   | 4.5 | 8.5 | 7   |
| Ystads lasarett                | 4 | 2   | 2.5 | 2.5 | 7.5 | 6   |
| Ängelholms sjukhus             | 6 | 2   | 1.5 | 4   | 5.5 | 4.5 |
| Örnsköldsviks sjukhus          | 5 | 4.5 | 3.5 | 3.5 | 6   | 6.5 |
| Östersunds sjukhus             | 2 | 2   | 3   | 5   | 4.5 | 7   |

<sup>1</sup> Counts as one unit in the National Patient Register (Blekingesjukhuset) and as two units in Swedeheart (Karlskrona and Karlshamn)

<sup>2</sup> Counts as one unit in the National Patient Register (NU-sjukvården) and as four units in Swedeheart (Trollhättan, Borås, Uddevalla, and Skene)

<sup>3</sup> Counts as one unit in the National Patient Register (Sahlgrenska Universitetssjukhuset) and as four units in Swedeheart (Cardiac intensive care unit, Medical emergency department, Mölndal, and Östra)

<sup>4</sup> Counts as one unit in the National Patient Register (Skaraborgs sjukhus) and as two units in Swedeheart (Lidköping and Skövde)

<sup>5</sup> Counts as one unit in the National Patient Register (S:t Görans sjukhus) and as two units in Swedeheart (Cardiac intensive care unit and Chest pain center)

<sup>6</sup> Counts as one unit in the National Patient Register (Universitetssjukhuset i Linköping) and as two units in Swedeheart (Cardiac intensive care unit and Medical emergency department)
